# Supplementary material
Source: PubMed Central journal article supplement (PMC4396013)
Supplement: ajnmmi0005-0169-f5.pdf [file ajnmmi0005-0169-f5.pdf]

## Utility of SPECT and PET to diagnose infection in a porcine osteomyelitis model

**Supplementary Table 1.** Body weight of pigs at scan, sequence of tracer injection, activity of tracers and time of diagnostic scan

| Scan sequence            |                                               |                              |                                               |                                               |                            |                              |                          |                     |
|--------------------------|-----------------------------------------------|------------------------------|-----------------------------------------------|-----------------------------------------------|----------------------------|------------------------------|--------------------------|---------------------|
| Pig 1, body weight 40 Kg | <sup>11</sup> C-methionine                    | <sup>111</sup> In-leukocytes | <sup>11</sup> C-PK11195                       | <sup>15</sup> O-H <sub>2</sub> O <sup>A</sup> | <sup>99m</sup> Tc-Nanocoll | <sup>111</sup> In-leukocytes | <sup>68</sup> Ga-citrate | <sup>18</sup> F-FDG |
| Time of injection        | 0 min                                         | 1 h 45 min                   | 2 h 0 min                                     | 4 h 23 min                                    | 6 h 30 min                 | -                            | 10 h 35 min              | 14 h 16 min         |
| Activity                 | 474 MBq                                       | 20.2 MBq                     | 424 MBq                                       | 500 MBq                                       | 500 MBq                    | -                            | 173 MBq                  | 299 MBq             |
| Time of scan             | 1 h 5 min                                     | -                            | 3 h 5 min                                     | Immediately                                   | 7 h 15 min                 | 7 h 15 min                   | 12 h 35 min              | 15 h 50 min         |
| Inj.-scan interval       | 1 h 5 min                                     | -                            | 1 h 5 min                                     | Immediately                                   | 45 min                     | 5 h 30 min                   | 2 h 0 min                | 1 h 34 min          |
| Pig 2, body weight 40 Kg | <sup>11</sup> C-methionine                    | <sup>111</sup> In-leukocytes | <sup>11</sup> C-PK11195                       | <sup>15</sup> O-H <sub>2</sub> O <sup>A</sup> | <sup>99m</sup> Tc-Nanocoll | <sup>111</sup> In-leukocytes | <sup>68</sup> Ga-citrate | <sup>18</sup> F-FDG |
| Time of injection        | 0 min                                         | 1 h 25 min                   | 2 h 5 min                                     | 4 h 8 min                                     | 6 h 34 min                 | - <sup>B</sup>               | 9 h 16 min               | 13 h 27 min         |
| Activity                 | 408 MBq                                       | 21.0 MBq                     | 414 MBq                                       | 1000 MBq                                      | 500 MBq                    | -                            | 113 MBq                  | 389 MBq             |
| Time of scan             | 1 h 5 min                                     | -                            | 3 h 10 min                                    | Immediately                                   | 7 h 39 min                 | 7 h 39 min                   | 11 h 29 min              | 14 h 34 min         |
| Inj.-scan interval       | 1 h 5 min                                     | -                            | 1 h 5 min                                     | Immediately                                   | 1 h 5 min                  | 6 h 14 min                   | 2 h 13 min               | 1 h 7 min           |
| Pig 3, body weight 39 Kg | <sup>11</sup> C-methionine                    | <sup>111</sup> In-leukocytes | <sup>15</sup> O-H <sub>2</sub> O <sup>A</sup> | <sup>11</sup> C-PK11195                       | <sup>99m</sup> Tc-Nanocoll | <sup>111</sup> In-leukocytes | <sup>68</sup> Ga-citrate | <sup>18</sup> F-FDG |
| Time of injection        | 0 min                                         | 1 h 24 min                   | 1 h 54 min <sup>C</sup>                       | 2 h 37 min                                    | 6 h 21 min                 | -                            | 9 h 6 min                | 13 h 24 min         |
| Activity                 | 500 MBq                                       | 14.3 MBq                     | 1000 MBq                                      | 464 MBq                                       | 500 MBq                    | -                            | 150 MBq                  | 365 MBq             |
| Time of scan             | 1 h 5 min                                     | -                            | Immediately                                   | 3 h 42 min                                    | 7 h 1 min                  | 7 h 1 min                    | 11 h 9 min               | 14 h 24 min         |
| Inj.-scan interval       | 1 h 5 min                                     | -                            | Immediately                                   | 1 h 5 min                                     | 40 min                     | 5 h 37 min                   | 2 h 3 min                | 1 h 0 min           |
| Pig 4, body weight 42 Kg | <sup>15</sup> O-H <sub>2</sub> O <sup>A</sup> | <sup>11</sup> C-methionine   | <sup>111</sup> In-leukocytes                  | <sup>11</sup> C-PK11195                       | <sup>99m</sup> Tc-Nanocoll | <sup>111</sup> In-leukocytes | <sup>68</sup> Ga-citrate | <sup>18</sup> F-FDG |
| Time of injection        | 0 min                                         | 45 min                       | 1 h 24 min                                    | 3 h 03 min                                    | 6 h 59 min                 | -                            | 9 h 22 min               | 13 h 52 min         |
| Activity                 | 850 MBq                                       | 498 MBq                      | 17.8 MBq                                      | 263 MBq                                       | 500 MBq                    | -                            | 175 MBq                  | 389 MBq             |
| Time of scan             | Immediately                                   | 1 h 50 min                   | -                                             | 4 h 8 min                                     | 7 h 52 min                 | 7 h 52 min                   | 11 h 22 min              | 14 h 59 min         |
| Inj.-scan interval       | Immediately                                   | 1 h 5 min                    | -                                             | 1 h 5 min                                     | 53 min                     | 6 h 28 min                   | 2 h 0 min                | 1 h 7 min           |

<sup>A</sup>Results of <sup>15</sup>O-H<sub>2</sub>O scan will be recorded elsewhere. <sup>B</sup>-indicates that the information is irrelevant. <sup>C</sup>A second <sup>15</sup>O-H<sub>2</sub>O scan was performed: injection at 2 h 15 min with 1000 MBq.

## Utility of SPECT and PET to diagnose infection in a porcine osteomyelitis model

**Supplementary Table 2.** Haematology of pigs before and after inoculation with *S. aureus* into the right femoral artery

| Normal Tests values <sup>A</sup> | Pig 1             |                   | Pig 2            |      | Pig 3 |      | Pig 4 |                 | Pig 1-X <sup>B</sup> |      | Pig 2-X <sup>B</sup> |      | Pig 3-X <sup>B</sup> |      | Pig 4-X <sup>B</sup> |      |      |
|----------------------------------|-------------------|-------------------|------------------|------|-------|------|-------|-----------------|----------------------|------|----------------------|------|----------------------|------|----------------------|------|------|
|                                  | -4pi <sup>C</sup> | +5pi <sup>C</sup> | Opi <sup>C</sup> | +7pi | -2pi  | +7pi | -3pi  | +7pi            | -4pi                 | +5pi | Opi                  | +4pi | -2pi                 | +4pi | -3pi                 | +4pi |      |
| Leukocytes (10 <sup>9</sup> /L)  | 11.3-22.8         | 19.9              | 22.5             | 19.2 | 30.4  | 21.6 | 15.2  | NT <sup>D</sup> | 21.9                 | 16.5 | 25.6                 | 17.9 | 18.1                 | 22.3 | NT                   | 13.7 | 13.0 |
| Lymphocytes (10 <sup>9</sup> /L) | 4.6-10.0          | 11.2              | 9.8              | 10.9 | 6.6   | 10.0 | 6.8   | NT              | 4.2                  | 9.5  | 6.6                  | 9.8  | 7.3                  | 12.5 | NT                   | 7.0  | 7.7  |
| Neutrophils (10 <sup>9</sup> /L) | 3.1-9.6           | 3.3               | 9.5              | 5.8  | 20.3  | 9.7  | 7.4   | NT              | 16.8                 | 5.1  | 16.9                 | 6.7  | 8.7                  | 8.5  | NT                   | 5.4  | 4.0  |
| Eosinophils (10 <sup>9</sup> /L) | 0.0-0.9           | 4.4               | 2.4              | 1.7  | 2.1   | 0.7  | 0.5   | NT              | 0.4                  | 0.7  | 1.1                  | 1.0  | 0.9                  | 0.6  | NT                   | 0.8  | 0.7  |
| Haemoglobin (mmol/L)             | 6.2-9.4           | 6.9               | 7.0              | 6.7  | 5.2   | 6.8  | 7.5   | NT              | 4.9                  | 7.4  | 7.3                  | 6.7  | 5.5                  | 6.8  | NT                   | 6.6  | 6.1  |
| CRP (µg/mL)                      | < 15.0            | 1.6               | 82.6             | 0.8  | 59.8  | 9.9  | 2.2   | 0.6             | 41.3                 | 2.0  | 62.3                 | 2.0  | NT                   | 1.5  | 44.3                 | 1.0  | 34.6 |
| Glucose (mmol/L) <sup>E</sup>    | 3.5-6.6           | NT                | NT               | NT   | 3.8   | NT   | 3.8   | NT              | 3.1                  | NT   | NT                   | NT   | NT                   | NT   | NT                   | NT   | NT   |

<sup>A</sup>Normal values supplied by the Central Laboratory. For the C-reactive protein (CRP) the normal-value shown here (< 15 µg/mL) corresponds to the highest value recorded in 5 normal pigs presented in two different publications using the same CRP test as employed in the present study [1, 2]. <sup>B</sup>Pig 1-X was not scanned because scanners and laboratory facilities were unavailable, and pig, 2-X, 3-X and 4-X were euthanized prior to scanning for ethical reasons (humane endpoints reached). <sup>C</sup>-4pi indicates blood sampling four days prior to inoculation, +5pi indicates sampling five days after inoculation, and Opi indicates sampling immediately before inoculation. <sup>D</sup>NT indicates not tested. <sup>E</sup>Blood glucose was measured at the day of scan (+7pi) in pigs 2, 3 and 4.

## Utility of SPECT and PET to diagnose infection in a porcine osteomyelitis model

**Supplementary Table 3.** Alignment of diagnostic CT, diagnostic PET (<sup>18</sup>F-FDG, <sup>68</sup>Ga-citrate, <sup>11</sup>C-PK11195 and <sup>11</sup>C-methionine), diagnostic SPECT (<sup>99m</sup>Tc-Nanocoll and <sup>111</sup>In-leucocytes), gross pathology and microbiology in the pelvic (hind) limbs and pelvic region seven days after inoculation with *S. aureus* in the right femoral artery of pigs 1, 2 and 4; significant lesions were only present in the right side as reported here

| PIG 1                                   | CT                                                                                     | PET                                                                                                                         | SPECT                                                                                                                                       | Gross pathology                                                                                   | Microbiology <sup>B</sup>                                                            |
|-----------------------------------------|----------------------------------------------------------------------------------------|-----------------------------------------------------------------------------------------------------------------------------|---------------------------------------------------------------------------------------------------------------------------------------------|---------------------------------------------------------------------------------------------------|--------------------------------------------------------------------------------------|
| Soft tissue related to inoculation site | Subcutaneous located swelling, 5.2 x 5.2 x 2.0 cm                                      | ---                                                                                                                         | --- <sup>A</sup>                                                                                                                            | Subcutaneous cystic lesion, diameter app. 5 cm                                                    | NT <sup>C</sup>                                                                      |
|                                         | --- <sup>A</sup>                                                                       | <sup>18</sup> F-FDG: intramuscular, craniomedial thigh muscle region, 0.9 x 1.1 x 1.2 cm (metabolic measurement)            | ---                                                                                                                                         | Abscess, craniomedial thigh muscle region, diameter approx. 1 cm                                  | <i>S. aureus</i> (heavy growth), <i>Escherichia coli</i> (few colonies) <sup>D</sup> |
| Bones                                   | Osteolysis (medulla) and sequestration, femoral head and neck                          | <sup>18</sup> F-FDG: femoral head and neck                                                                                  | ---                                                                                                                                         | Suppurative osteomyelitis, femoral head and neck                                                  | NT                                                                                   |
|                                         | Osteolysis (medulla and cortex) and sequestration, distal physis region femur          | <sup>18</sup> F-FDG: distal physis region femur                                                                             | <sup>111</sup> In-leukocytes: distal physis region femur                                                                                    | Suppurative osteomyelitis, distal physis region femur                                             | <i>S. aureus</i> (moderate growth)                                                   |
|                                         | Osteolysis (medulla), proximal physis region tibia                                     | <sup>18</sup> F-FDG: proximal physis region tibia                                                                           | ---                                                                                                                                         | ---                                                                                               | NT                                                                                   |
|                                         | Osteolysis (cortex), distal physis region tibia                                        | ---                                                                                                                         | <sup>111</sup> In-leukocytes: distal physis region tibia                                                                                    | ---                                                                                               | NT                                                                                   |
|                                         | Osteolysis (medulla and cortex) and sequestration, distal physis region metatarsus III | <sup>18</sup> F-FDG: distal physis region metatarsus III<br><sup>11</sup> C-methionine: distal physis region metatarsus III | <sup>111</sup> In-leukocytes: distal physis region metatarsus III                                                                           | Suppurative osteomyelitis and medial suppurative periostitis, distal physis region metatarsus III | NT                                                                                   |
| Soft tissue peripheral to bones         | Edema peripheral to distal femur                                                       | ---                                                                                                                         | ---                                                                                                                                         | ---                                                                                               | NT                                                                                   |
|                                         | Swelling peripheral to distal metatarsus III                                           | <sup>18</sup> F-FDG: distal metatarsus III<br><sup>11</sup> C-methionine: distal metatarsus III                             | <sup>111</sup> In-leukocytes: distal metatarsus III                                                                                         | Subcutaneous abscess medial to distal metatarsus III, diameter 1.5 cm                             | <i>S. aureus</i> (heavy growth)                                                      |
| Joints                                  | ---                                                                                    | ---                                                                                                                         | ---                                                                                                                                         | Serous arthritis knee joint                                                                       | <i>Aerococcus viridans</i> (heavy growth)                                            |
| Lymph nodes                             | Mammary lymph node slightly enlarged                                                   | <sup>11</sup> C-methionine: mammary lymph node                                                                              | ---                                                                                                                                         | ---                                                                                               | NT                                                                                   |
|                                         | ---                                                                                    | ---                                                                                                                         | --- <sup>E</sup>                                                                                                                            | Enlarged medial iliac lymph nodes                                                                 | NT                                                                                   |
| PIG 2                                   | CT                                                                                     | PET                                                                                                                         | SPECT                                                                                                                                       | Gross pathology                                                                                   | Micobiology <sup>B</sup>                                                             |
| Soft tissue related to inoculation site | --- <sup>A</sup>                                                                       | ---                                                                                                                         | ---                                                                                                                                         | ---                                                                                               | NT <sup>C</sup>                                                                      |
| Bones                                   | Osteolysis (medulla an cortex), patella                                                | ---                                                                                                                         | <sup>111</sup> In-leukocytes: cortical osteolytic region of paella<br><sup>99m</sup> Tc-Nanocoll: absence of activity in medulla of patella | Suppurative osteomyelitis, patella                                                                | NT                                                                                   |

## Utility of SPECT and PET to diagnose infection in a porcine osteomyelitis model

| Soft tissue peripheral to bones         | Swelling and edema peripheral to the knee joint                                                   | <sup>18</sup> F-FDG: tissue peripheral to patella and bordering patella<br><sup>68</sup> Ga-citrate: tissue peripheral to patella and bordering patella<br><sup>11</sup> C-methionine: tissue peripheral to patella<br><sup>11</sup> C-PK11195: tissue peripheral to patella | <sup>111</sup> In-leukocytes: tissue peripheral and in particular lateral to patella                                                  | Cellulitis peripheral to patella, diameter approx. 10 cm                                                                                                                      | <i>S. aureus</i> (few colonies)                 |
|-----------------------------------------|---------------------------------------------------------------------------------------------------|------------------------------------------------------------------------------------------------------------------------------------------------------------------------------------------------------------------------------------------------------------------------------|---------------------------------------------------------------------------------------------------------------------------------------|-------------------------------------------------------------------------------------------------------------------------------------------------------------------------------|-------------------------------------------------|
|                                         | Edema in the soft tissues of the thigh and in the soft tissues of the lower limb and tarsal joint | ---                                                                                                                                                                                                                                                                          | ---                                                                                                                                   | Subcutaneous edema in the lower limb and around the tarsal joint                                                                                                              | NT                                              |
|                                         | Edematous region with gas-bubbles deep in the caudal thigh muscles                                | ---                                                                                                                                                                                                                                                                          | <sup>111</sup> In-leukocytes: tissue deep in the caudal thigh muscles                                                                 | ---                                                                                                                                                                           | NT                                              |
| Joints                                  | ---                                                                                               | ---                                                                                                                                                                                                                                                                          | ---                                                                                                                                   | Fibrino-suppurative arthritis knee joint                                                                                                                                      | <i>S. aureus</i> (heavy growth)                 |
| Lymph nodes                             | ---                                                                                               | <sup>18</sup> F-FDG: medial iliac lymph node area <sup>F</sup><br><sup>68</sup> Ga-citrate: medial iliac lymph node area <sup>F</sup>                                                                                                                                        | --- <sup>E</sup>                                                                                                                      | Enlarged medial iliac lymph nodes                                                                                                                                             | NT                                              |
| PIG 4 <sup>G</sup>                      | CT                                                                                                | PET                                                                                                                                                                                                                                                                          | SPECT                                                                                                                                 | Gross pathology                                                                                                                                                               | Microbiology <sup>B</sup>                       |
| Soft tissue related to inoculation site | Subcutaneous located swelling, 8.0 x 6.6 x 6.1 cm                                                 | <sup>18</sup> F-FDG: sphere-formed subcutaneous accumulation, 4,7 x 6,0 x 6,4 cm (metabolic measurement)<br><sup>68</sup> Ga-citrate: sphere-formed accumulation<br><sup>11</sup> C-methionine: sphere-formed accumulation                                                   | <sup>111</sup> In-leukocytes: subcutaneous located swelling                                                                           | Subcutaneous abscess, diameter approx. 8 cm; abscess, craniomedial thigh muscle region, communicating with the subcutaneous abscess by a fibrous stalk, diameter approx. 1 cm | <i>S. aureus</i> (heavy growth), both abscesses |
| Bones                                   | Osteolysis (medulla and cortex), almost entire metatarsus II                                      | <sup>18</sup> F-FDG: entire metatarsus II<br><sup>68</sup> Ga-citrate: entire metatarsus II<br><sup>11</sup> C-methionine: entire metatarsus II                                                                                                                              | <sup>111</sup> In-leukocytes: entire metatarsus II and associated soft tissue (not possible to distinguish the two tissue components) | Suppurative osteomyelitis and suppurative periostitis, entire metatarsus II                                                                                                   | NT                                              |
| Soft tissue peripheral to bones         | Swelling peripheral to metatarsus II                                                              | <sup>18</sup> F-FDG: sphere formed accumulation, 2.6 x 4.6 x 5.1 cm (metabolic measurement)<br><sup>68</sup> Ga-citrate: semi-sphere formed accumulation located in the deep part<br><sup>11</sup> C-methionine: semi-sphere formed accumulation located in the deep part    | <sup>111</sup> In-leukocytes: soft tissue peripheral to metatarsus I                                                                  | Subcutaneous abscess medial to metatarsus II, diameter 2,0 cm                                                                                                                 | <i>S. aureus</i> (heavy growth)                 |
| Joints                                  | ---                                                                                               | ---                                                                                                                                                                                                                                                                          | ---                                                                                                                                   | Arthritis joint between metatarsus II and proximal phalanx                                                                                                                    | NT                                              |
| Lymph nodes                             | Mammary lymph node enlarged                                                                       | <sup>18</sup> F-FDG: mammary lymph node<br><sup>68</sup> Ga-citrate: mammary lymph node<br><sup>11</sup> C-methionine: mammary lymph node<br><sup>11</sup> C-PK11195: mammary lymph node                                                                                     | ---                                                                                                                                   | ---                                                                                                                                                                           | NT                                              |
|                                         | Medial iliac lymph node area slightly enlarged <sup>F</sup>                                       | <sup>18</sup> F-FDG: medial iliac lymph node area <sup>F</sup>                                                                                                                                                                                                               | --- <sup>E</sup>                                                                                                                      | Enlarged medial iliac lymph nodes                                                                                                                                             | NT                                              |

<sup>A</sup>--- indicates absence of signal at any location within the stated tissue compartment. <sup>B</sup>All *S. aureus* isolates from the pigs were phenotypically indistinguishable from the inoculated strain. <sup>C</sup>NT indicates not tested. <sup>D</sup>Deemed to be a contaminant. <sup>E</sup>Only mammary lymph nodes scanned, i.e. included in the SPECT bed position. <sup>F</sup>Distinguishing the various anatomical soft tissue structures within the pelvic cavity by CT can be challenging, which is why the scan signal has been assigned to the area of the medial iliac lymph nodes. <sup>G</sup>Pig 3 was without infection and is not included in this table.

## Utility of SPECT and PET to diagnose infection in a porcine osteomyelitis model

### References

- [1] Soerensen KE, Nielsen OL, Jensen HE, Leifsson PS and Iburg TM. Pulmonary Lesions Following Intravenous Inoculation with A High Concentration of Staphylococcus Aureus in Pigs. *Journal of Comparative Pathology* 2010; 143: 324-324.
- [2] Leifsson PS, Iburg T, Jensen HE, Agerholm JS, Kjelgaard-Hansen M, Wiinberg B, Heegaard PM, Astrup LB, Olsson AE, Skov MG, Aalbaek B and Nielsen OL. Intravenous inoculation of Staphylococcus aureus in pigs induces severe sepsis as indicated by increased hypercoagulability and hepatic dysfunction. *FEMS Microbiol Lett* 2010; 309: 208-216.
